# Supplementary material for: Effect of co-ligand number on the optoelectronic properties of first- and second-generation heteroleptic green emissive iridium(iii) complex-cored dendrimers
Source: Royal Society of Chemistry journal article supplement (doi:10.1039/d4tc02336f), 2024-01-01
Supplement: d4tc02336f1.pdf [file d4tc02336f1.pdf]

### Supplementary Information

#### Effect of co-ligand number on the optoelectronic properties of first- and second-generation heteroleptic green emissive iridium(III) complex-cored dendrimers

Manikandan Koodalingam, Junhyuk Jang, Mile Gao, Paul L. Burn\*, Jos C. M. Kistemaker, Emma V. Puttock, Paul E. Shaw

Centre for Organic Photonics & Electronics (COPE), School of Chemistry & Molecular Biosciences, University of Queensland, St. Lucia, QLD, 4072, Australia.

\*p.burn2@uq.edu.au

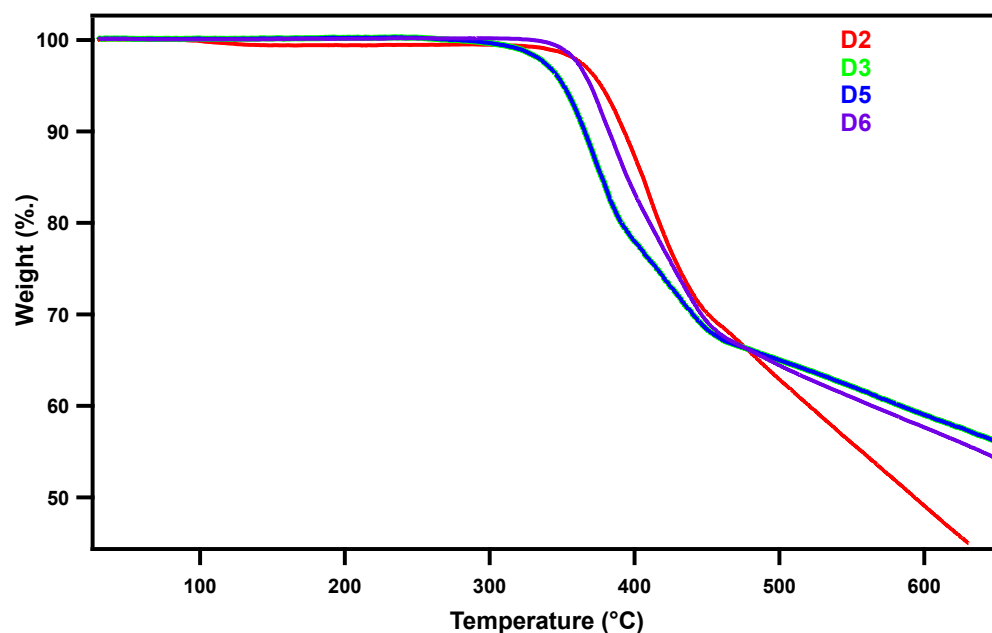

Fig. S1. TGA analysis of the dendrimers **D2**, **D3**, **D5** and **D6**. Note the traces of **D3** and **D5** overlap.

(a)

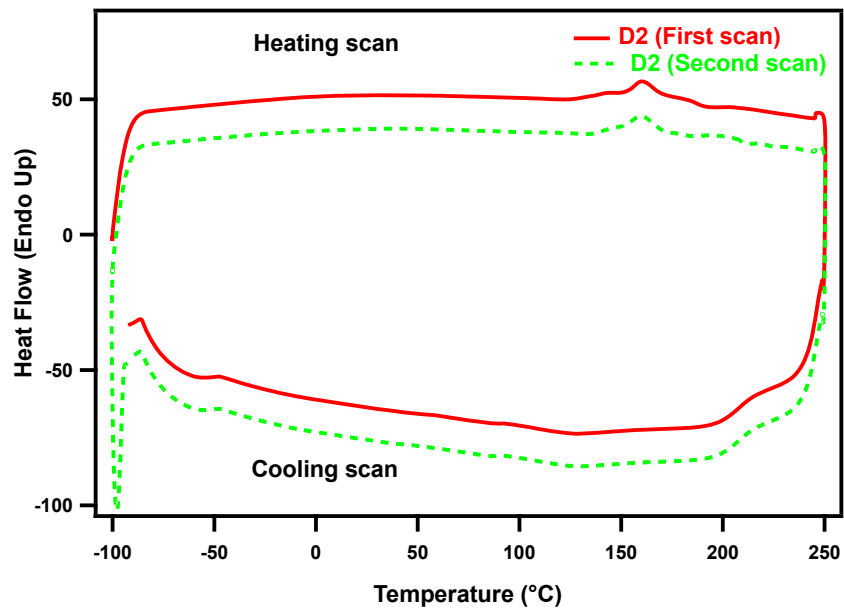

(b)

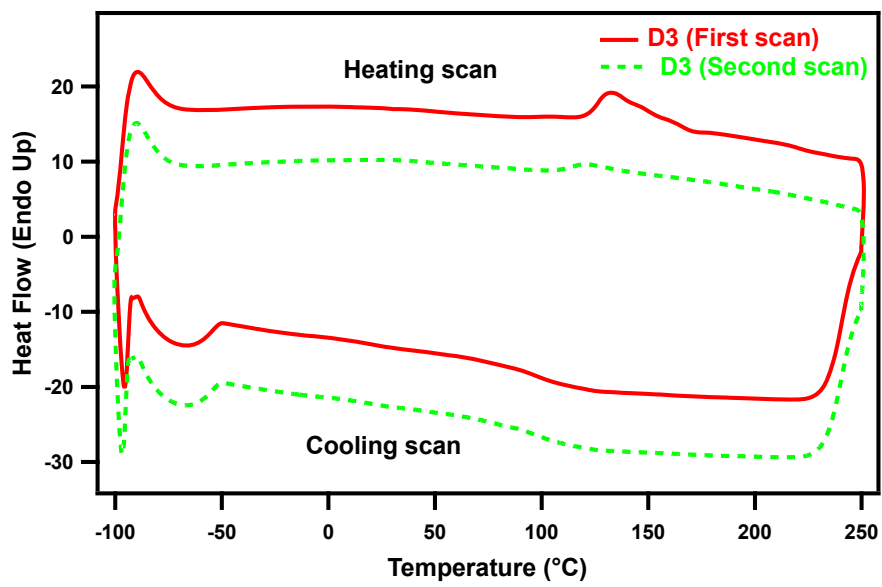

(c)

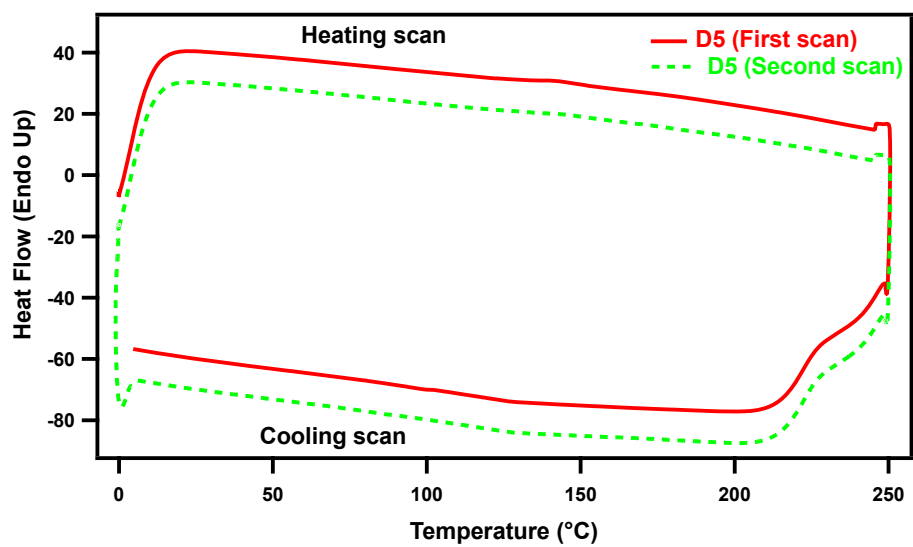

(d)

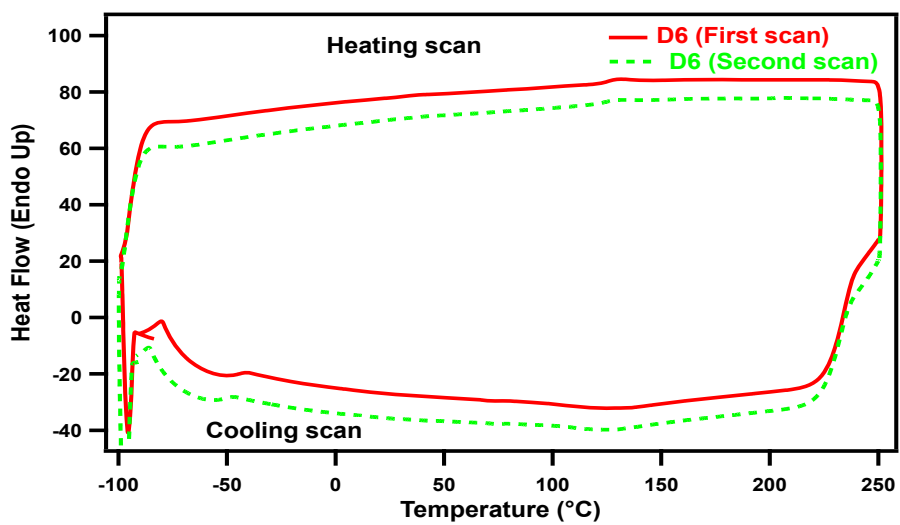

Fig. S2. DSC chromatogram of the dendrimers (a) D2, (b) D3, (c) D5 and (d) D6.

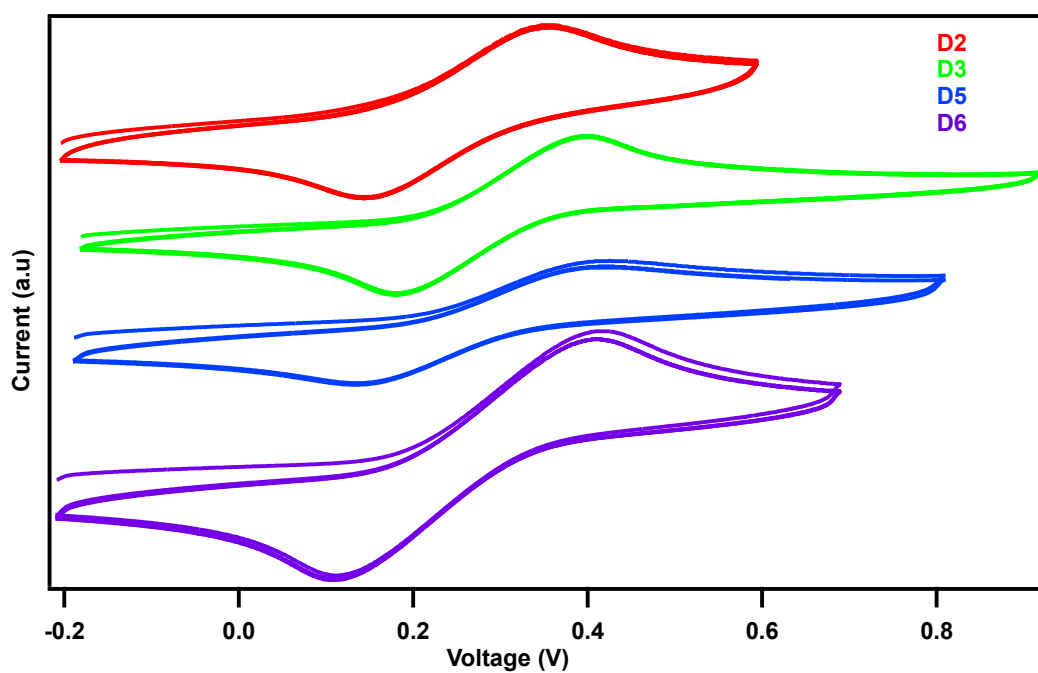

Fig. S3. Oxidation cyclic Voltammograms of the dendrimers **D2**, **D3**, **D5** and **D6** in dichloromethane. The potentials are referenced against the ferrocene/ferrocenium couple.

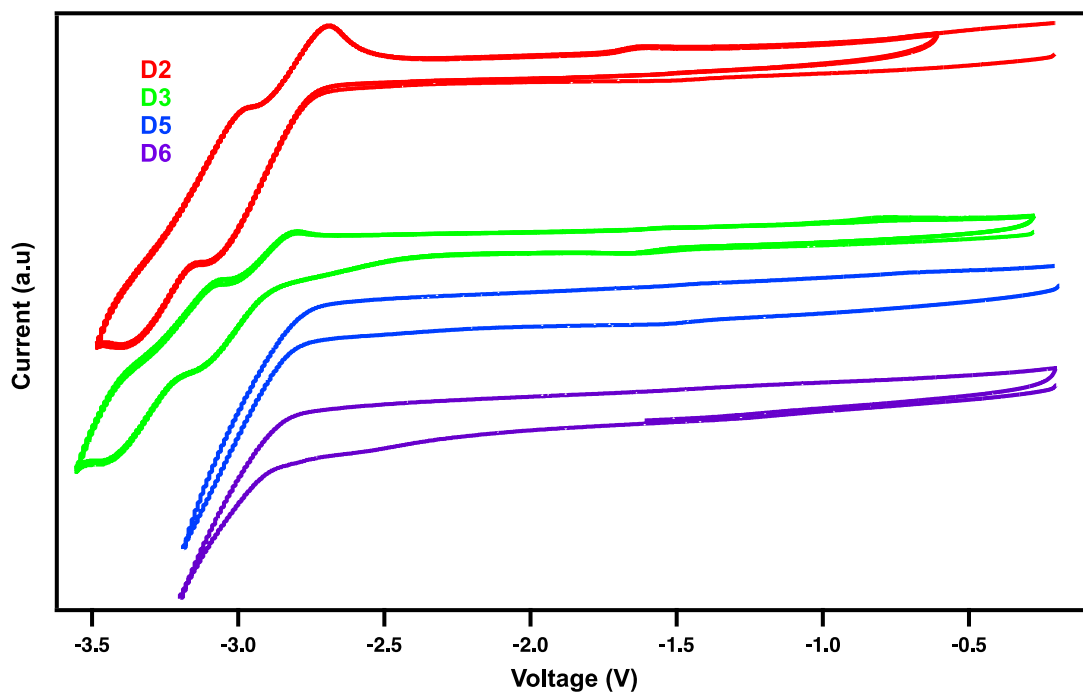

Fig. S4. Reduction cyclic voltammograms of the dendrimers **D2**, **D3**, **D5** and **D6** in tetrahydrofuran in the presence of 0.1 M tetra-*n*-butylammonium perchlorate at room temperature. The potentials are referenced against the ferrocene/ferrocenium couple.

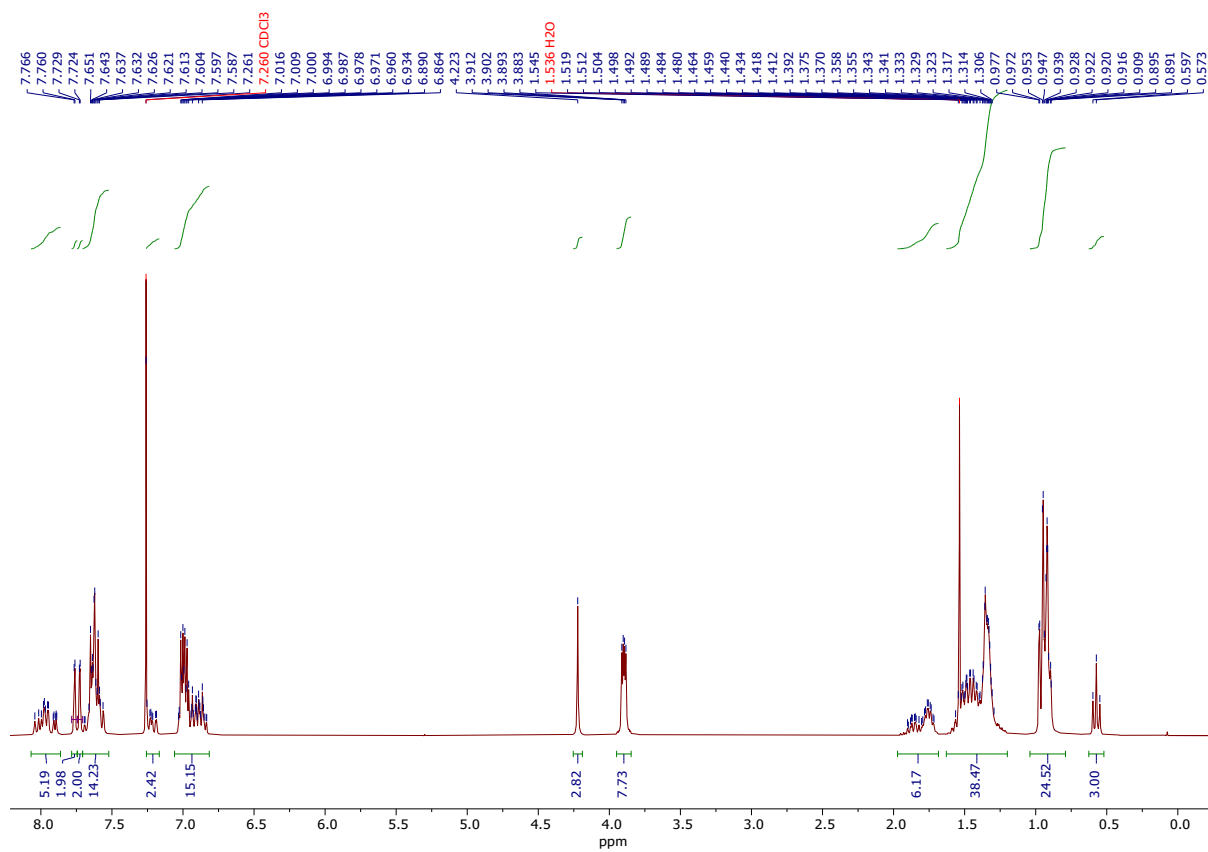

Fig. S5. <sup>1</sup>H NMR of dendrimer **D2** in CDCl<sub>3</sub>.

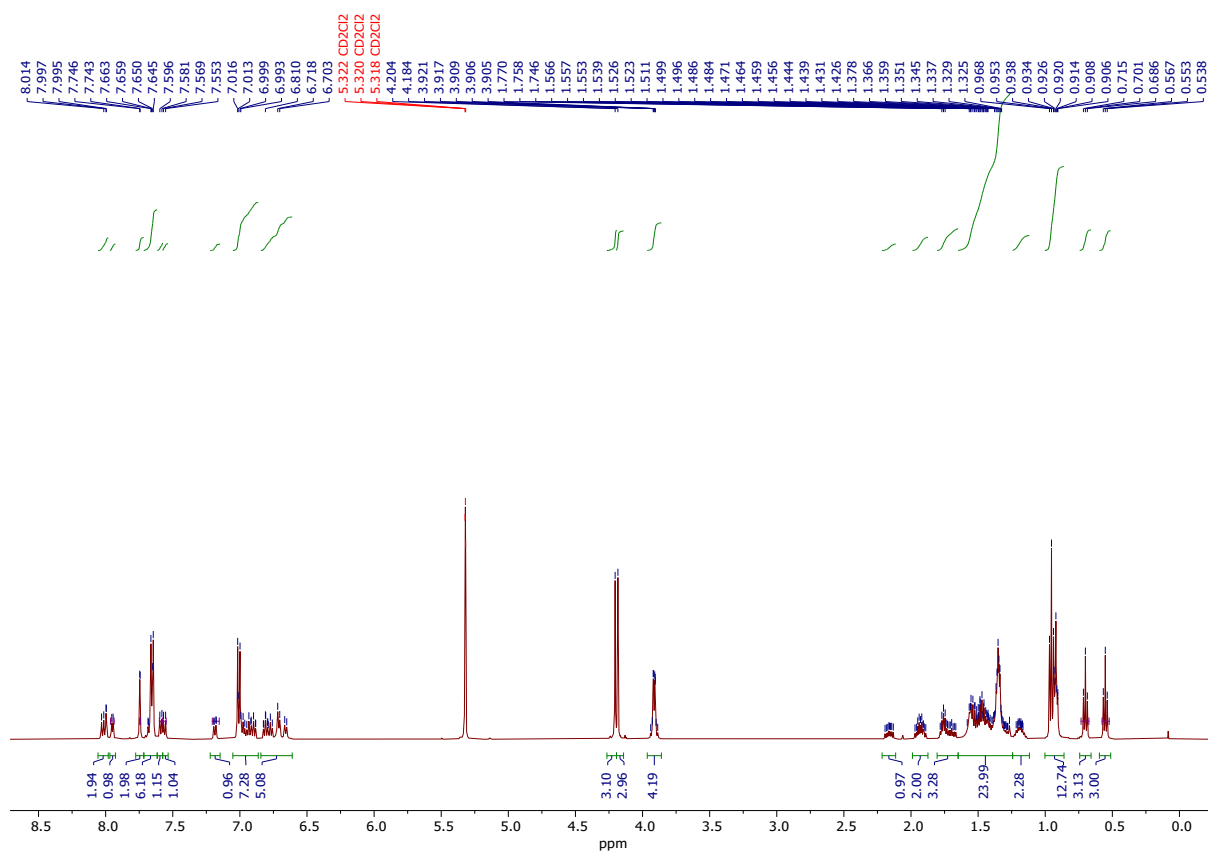

Fig. S6. <sup>1</sup>H NMR of dendrimer **D3** in CD<sub>2</sub>Cl<sub>2</sub>.

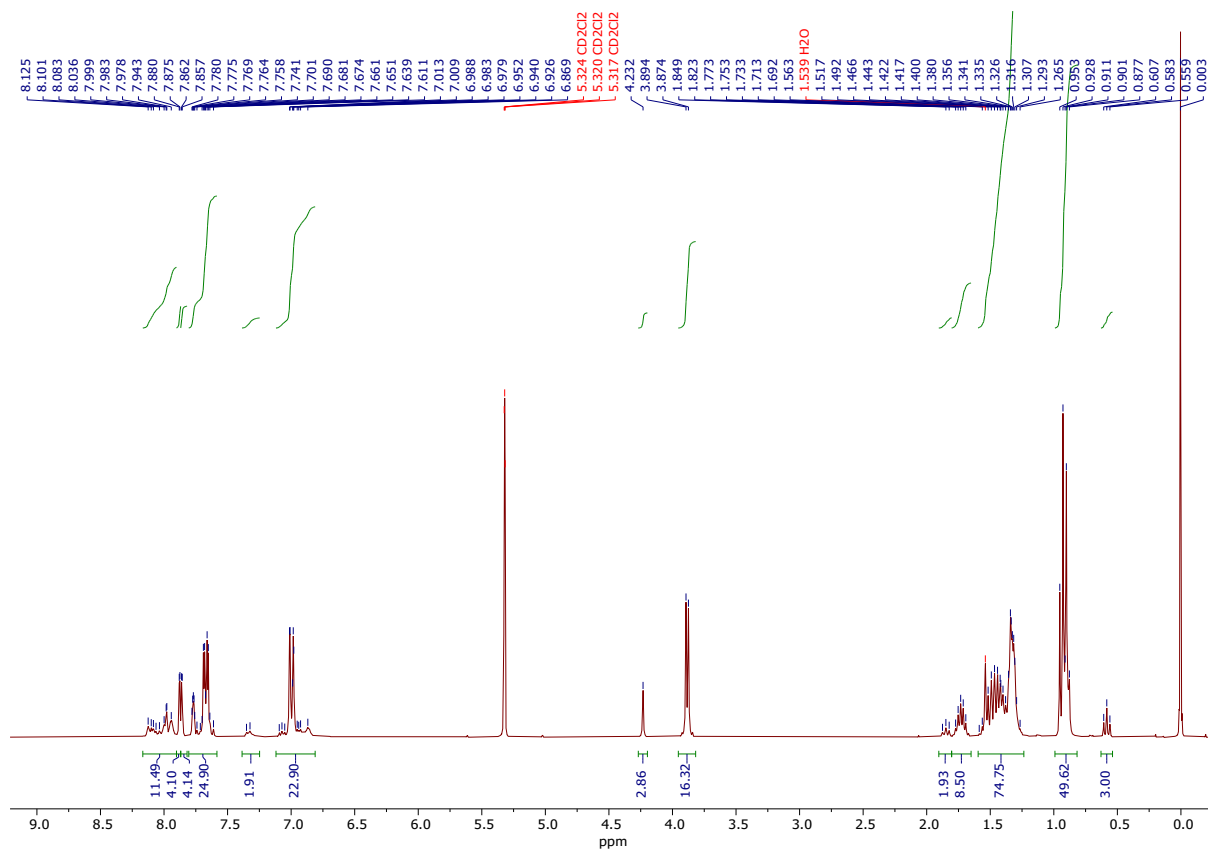

Fig. S7. <sup>1</sup>H NMR of dendrimer **D5** in CD<sub>2</sub>Cl<sub>2</sub>.

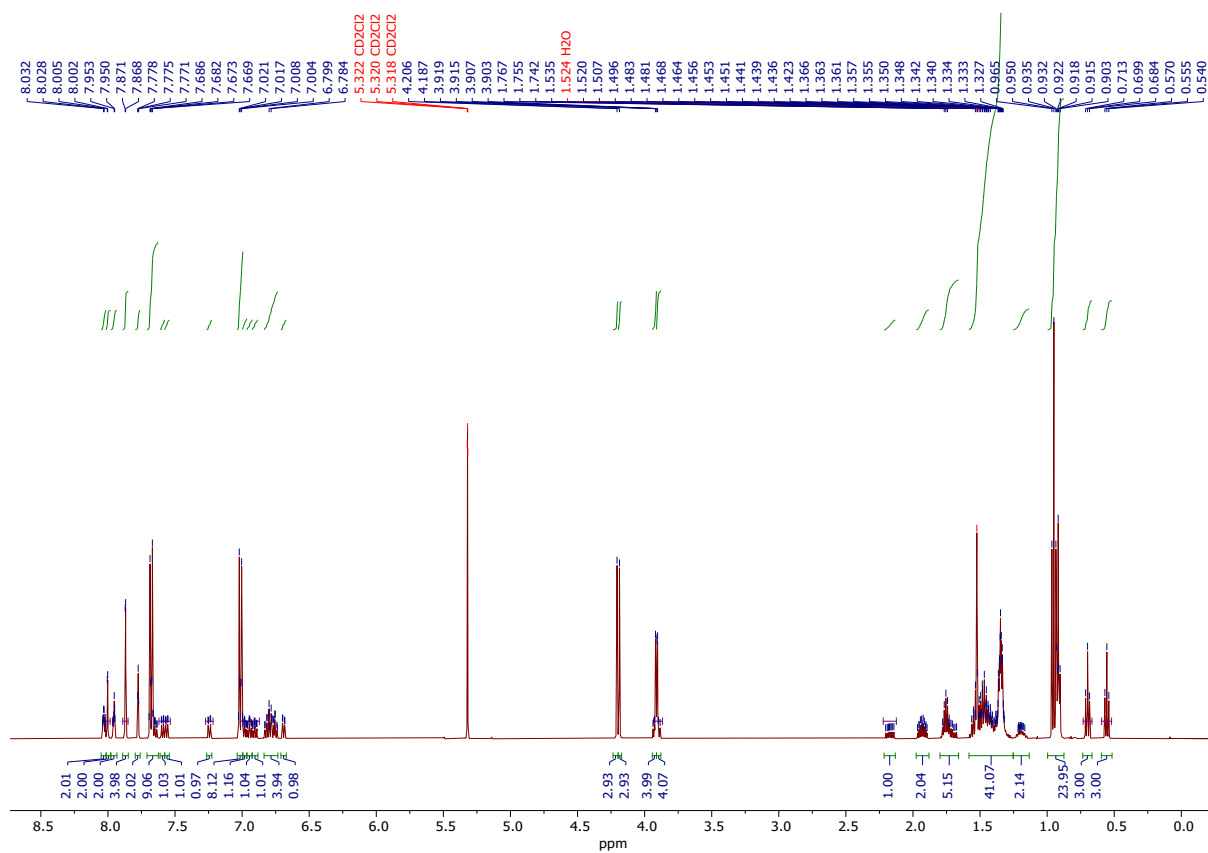

Fig. S8. <sup>1</sup>H NMR of dendrimer **D6** in CD<sub>2</sub>Cl<sub>2</sub>.

**Table S1** EQE summary of green emissive phosphorescent dendrimer-based OLEDs.

| Device structure                                              | EQE [%] | Reference                                                                                                                         |
|---------------------------------------------------------------|---------|-----------------------------------------------------------------------------------------------------------------------------------|
| ITO/PEDOT:PSS/ (15 wt%) green emitter:TCTA:TPBi/TmPyPB/LiF/Al | 19.6    | A. Maheswaran, R. Kumaresan, H-Y. Park, J. Kim, H. Kim, S.-Ho Jin, <i>Org. Electron.</i> , 2022, <b>106</b> , 106517              |
| ITO/PEDOT:PSS/ (5 mol%) green emitter:TCTA/TmPyPB/LiF/Al      | 17.1    | D. M. Stoltzfus, W. Jiang, A. M. Brewer, P. L. Burn, <i>J. Mater. Chem. C</i> , 2018, <b>6</b> , 10315-10326                      |
| ITO/PEDOT:PSS/(50 wt%) green emitter:TCCz/TPBi/LiF/Al         | 16.6    | J. Ding, J. Gao, Y. Cheng, Z. Xie, L. Wang, D. Ma, X. Jing, F. Wang, <i>Adv. Funct. Mater.</i> 2006, <b>16</b> , 575–581.         |
| ITO/(50 wt%) green emitter:CBP/TBPI/ LiF/Al                   | 14.7    | J. W. Levell, W.-Y. Lai, R. J. Borthwick, P. L. Burn, S.-C. Lo, I. D. W. Samuel, <i>New J. Chem.</i> , 2012, <b>36</b> , 407-413. |
| ITO/PEDOT:PSS/(10 wt)% green emitter:TCCz/TPBi/LiF/Al         | ≈10%    | L. Chen, Z. Ma, J. Ding, L. Wang, X. Jing, F. Wang, <i>Org. Electron.</i> , 2012, <b>13</b> , 2160-2166.                          |
| ITO/PEDOT:PSS/PVK/green emitter/CsF/Al                        | ≈0.08   | A. Liang, Z. Liu, Z. Wang, W. Zhou, Y. Zhang, S. Hu, J. Xu, W. Zhu, M. Cai, <i>Opt. Materials</i> , 2020, <b>106</b> , 109976.    |
